# Supplementary material for: Identification and characterization of a tobacco metal tolerance protein, NtMTP2
Source: Royal Society of Chemistry journal article supplement (doi:10.1039/d0mt00210k), 2020-11-03

### Supplementary Figure S2: Stability of the reference gene *PP2A*

RNA transcription levels of *PP2A* gene, presented as Cp mean values in different samples: A) in whole roots (R) and whole leaves (L) from plants grown at control conditions for 4 weeks; B) in apical (R ap) and basal (R bas) part of roots, stem (S), young (L yng) and old (L old) leaves from plants grown at control conditions for 9 weeks; C) in apical (R ap) and basal (R bas) part of roots, and in leaves (L) from plants grown in (i) standard nutrient solution (control, 1/4 Knop's medium); (ii) in medium supplemented with 20  $\mu\text{M}$  Co; (iii) in medium supplemented with 30  $\mu\text{M}$  Ni for 3 days.

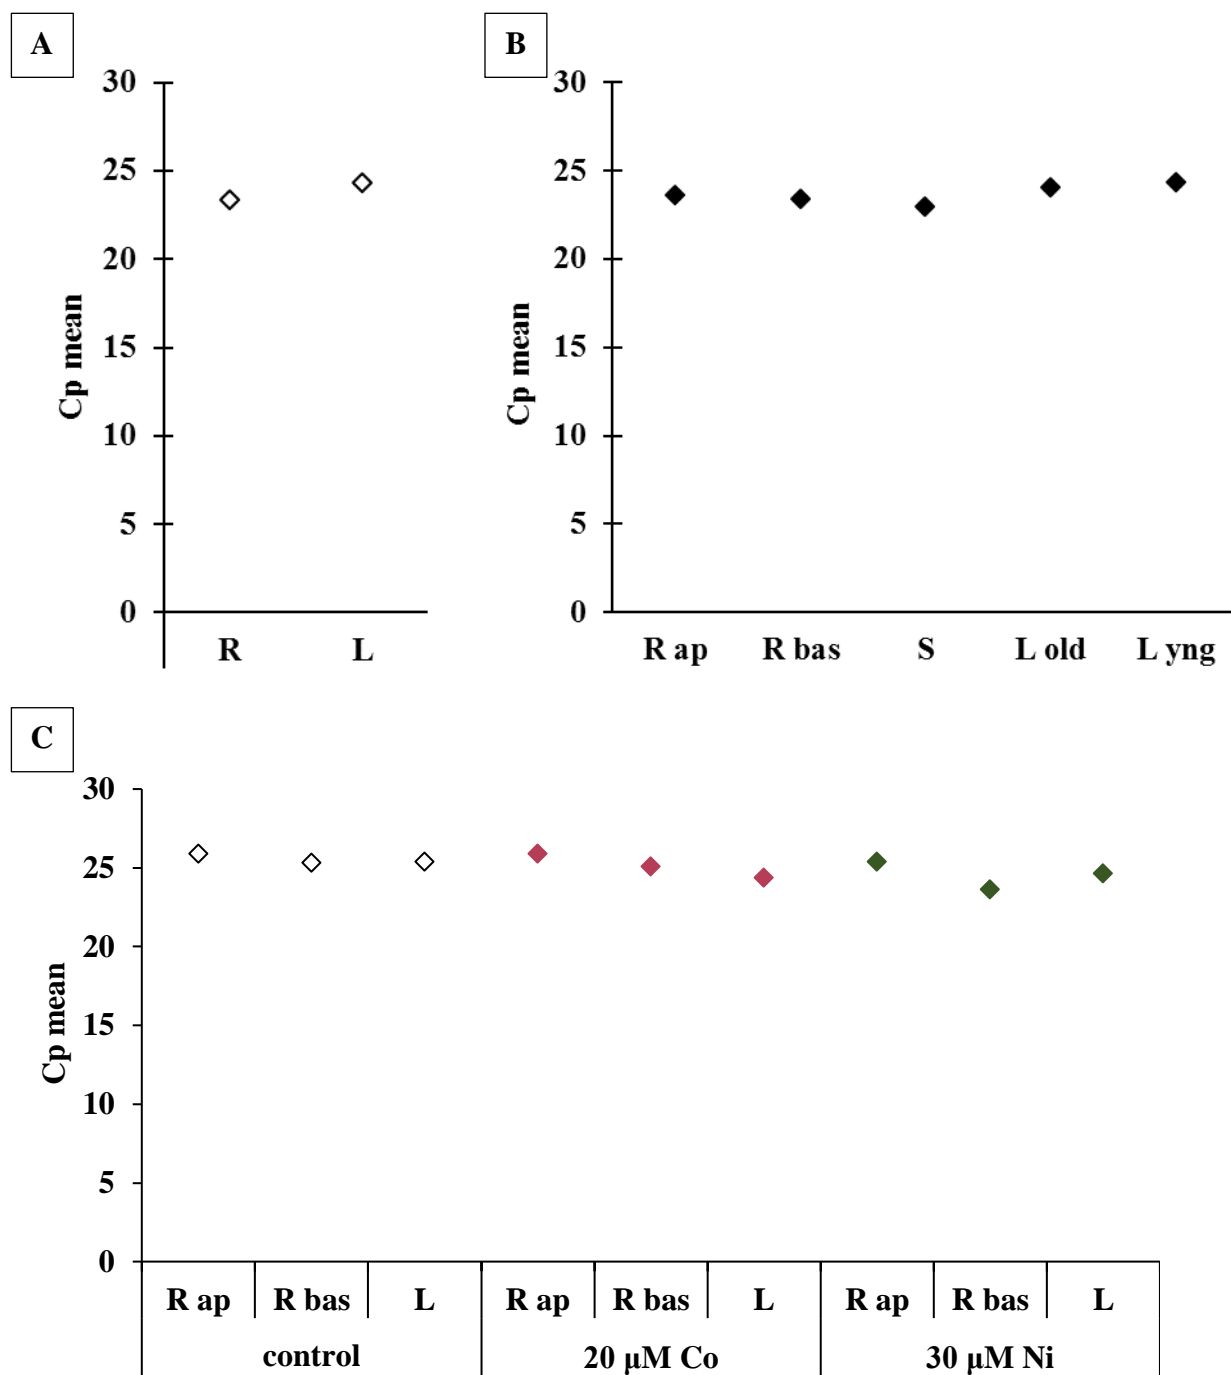

Supplement: d0mt00210k3.pdf [file d0mt00210k3.pdf]
