# Supplementary material for: Identification and characterization of a tobacco metal tolerance protein, NtMTP2
Source: Royal Society of Chemistry journal article supplement (doi:10.1039/d0mt00210k), 2020-11-03

### Supplementary Figure S3: Appearance of tobacco plants used for GUS staining

Transgenic tobacco plants expressing *NtMTP2<sub>p</sub>::GUS* were grown for 4 days at (i) control medium (1/4 Knop's medium); (ii) Zn deficiency; (iii) 20  $\mu$ M Zn; (iv) Co deficiency; (v) 20  $\mu$ M Co. Panel A depicts plants appearance at the beginning of the treatment (3.5-week-old-plants); panels B and C - on the 4<sup>th</sup> day after treatment. Lower part of panel C presents impact of 20  $\mu$ M Co on the appearance of younger leaves.

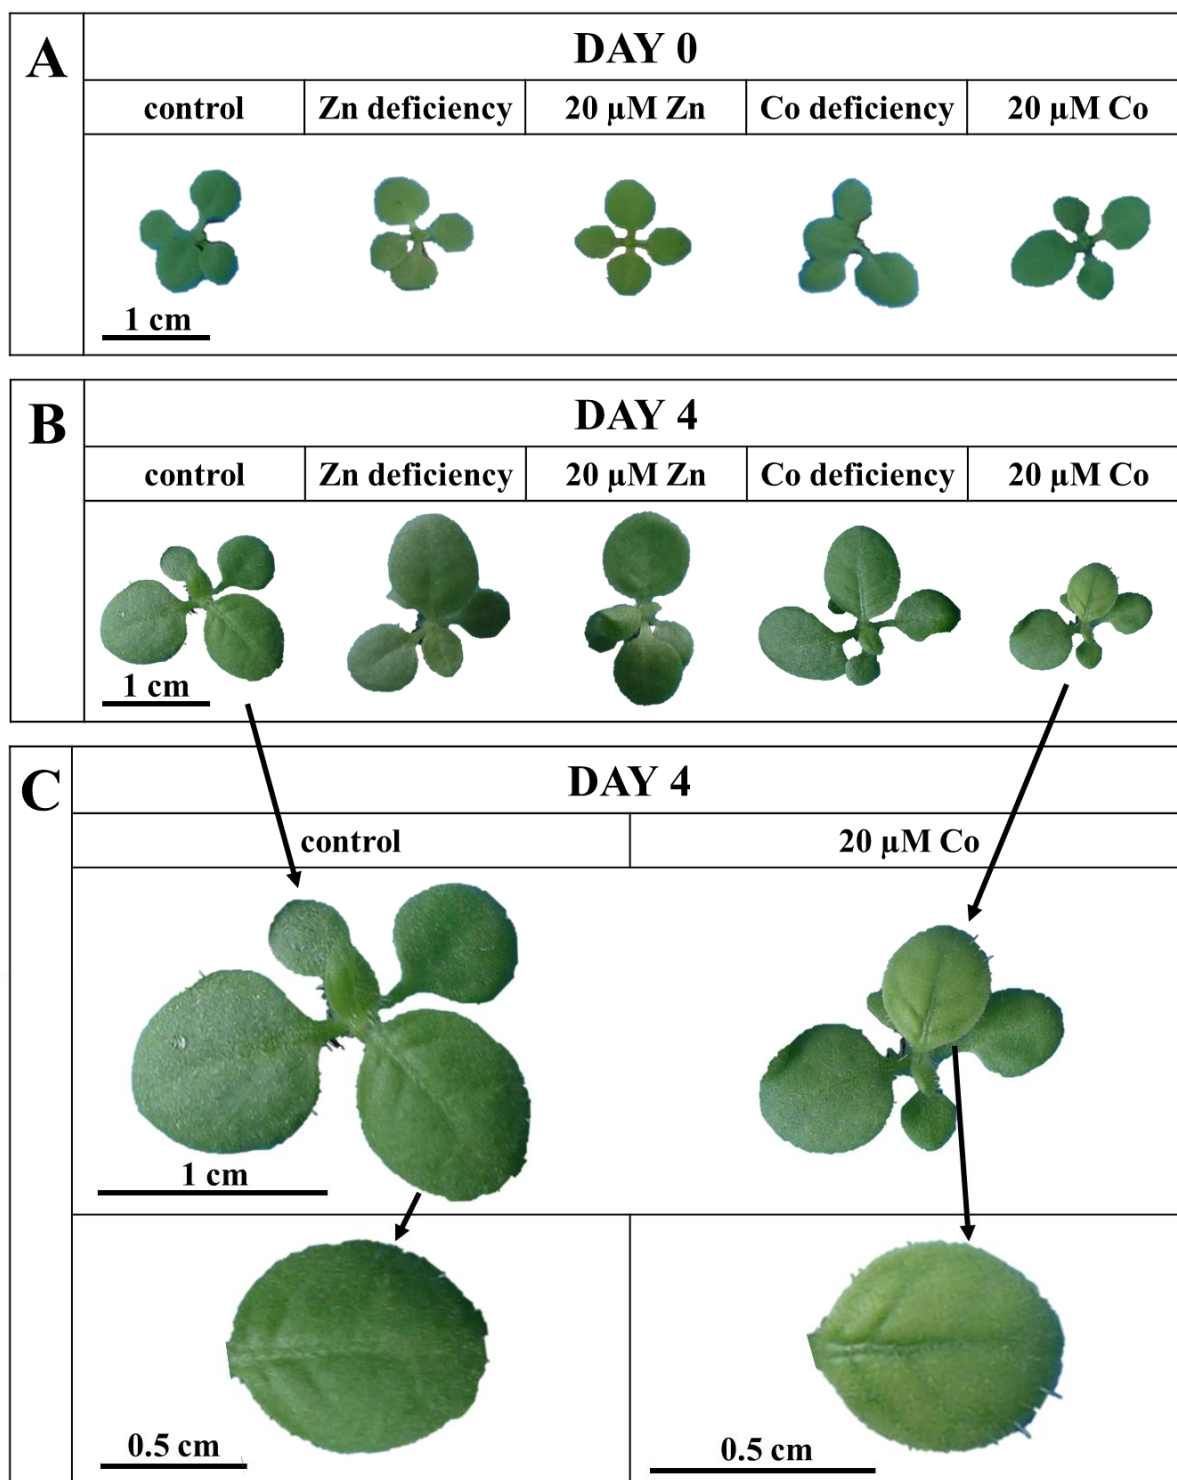

Supplement: d0mt00210k4.pdf [file d0mt00210k4.pdf]
