# Supplementary material for: Identification and characterization of a tobacco metal tolerance protein, NtMTP2
Source: Royal Society of Chemistry journal article supplement (doi:10.1039/d0mt00210k), 2020-11-03

### Supplementary Figure S4: Appearance of tobacco plants used for GUS staining of leaves cross-sections

Appearance of wild type (WT) tobacco 5-week-old plants grown for 3 days at (i) control medium (1/4 Knop's medium); (ii) Co deficiency; (iii) 20  $\mu\text{M}$  Co; (iv) 200  $\mu\text{M}$  Zn. Panel A and B depicts plants appearance on the 3<sup>rd</sup> day after treatment. Panel B presents impact of 20  $\mu\text{M}$  Co or 200  $\mu\text{M}$  Zn on the appearance of leaves.

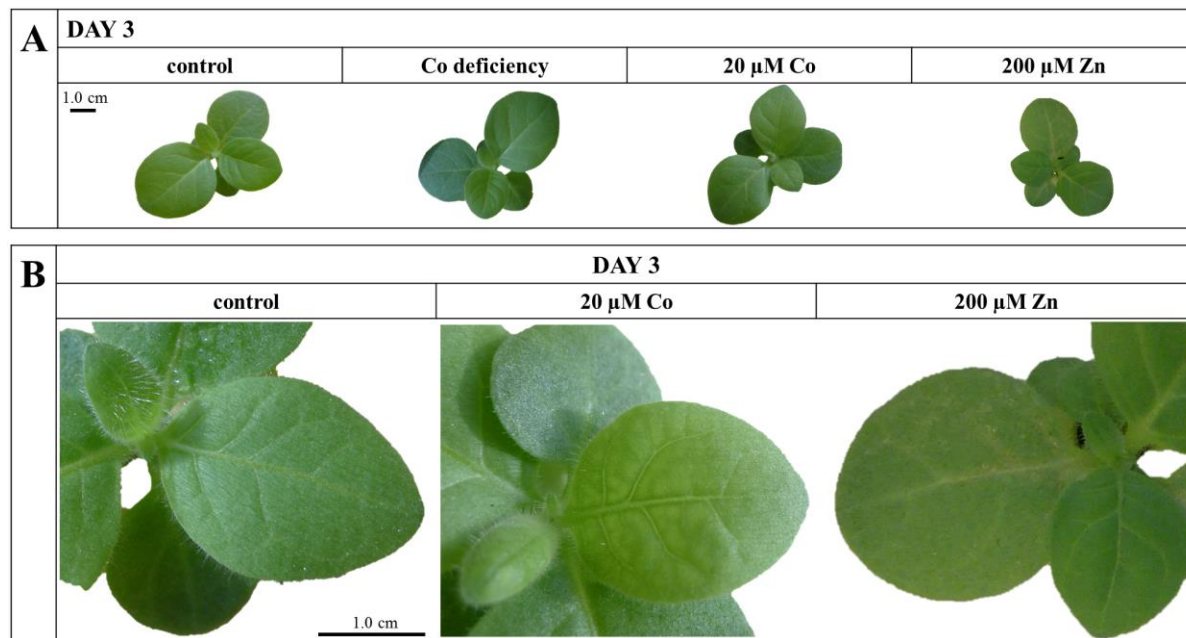

Supplement: d0mt00210k5.pdf [file d0mt00210k5.pdf]
