# Supplementary material for: Identification and characterization of a tobacco metal tolerance protein, NtMTP2
Source: Royal Society of Chemistry journal article supplement (doi:10.1039/d0mt00210k), 2020-11-03
Supplement: d0mt00210k6.pdf [file d0mt00210k6.pdf]

### Supplementary Table S1

The list of primer sequences used for expression analysis, Race PCR reactions and cloning.

| Gene name                                                                    | Gene ID in GenBank | Primer FOR                  |                                                  | Primer REV                   |                              |
|------------------------------------------------------------------------------|--------------------|-----------------------------|--------------------------------------------------|------------------------------|------------------------------|
|                                                                              |                    | Name                        | Sequence                                         | Name                         | Sequence                     |
| <b>Expression Analysis</b>                                                   |                    |                             |                                                  |                              |                              |
| <i>PP2A</i>                                                                  | AJ007496           | <i>PP2A_for</i>             | GCACATTCATTCAGTTTGAACC                           | <i>PP2A_rev</i>              | GTAGCATATAAAGCAGTCAGC        |
| <i>NtMTP2</i>                                                                | XM_016593654       | <i>Nt0825_for</i>           | AGACGGCGAGAGGATTTCC                              | <i>Nt0825_rev</i>            | ACGACAACAATGCCACTCCA         |
| <b>RACE PCR Reaction</b>                                                     |                    |                             |                                                  |                              |                              |
|                                                                              |                    | 0825_S_GSP2-1               | GATTACGCCAAGCTT<br>GATGATTCAGCTACAAGTATGGGGAGTCG |                              |                              |
| <b>AMPLIFICATION of full <i>NtMTP2</i> sequence for pENTR/D-TOPO cloning</b> |                    |                             |                                                  |                              |                              |
|                                                                              |                    | <i>Nt0825_pEntr_for</i>     | <u>C</u> ACCATGGTAGCTAGATTCATTTCA                | <i>Nt0825_pEntr_rev_END</i>  | GTTATCTTTCCTCTCACTTCTACT     |
|                                                                              |                    |                             |                                                  | <i>Nt0825_pEntr_rev_STOP</i> | TCAGTTATCTTTCCTCTCACTTCT     |
| <b>AMPLIFICATION of <i>promNtMTP2</i> sequence for pENTR/D-TOPO cloning</b>  |                    |                             |                                                  |                              |                              |
|                                                                              |                    | <i>promNtMTP2_pEntr_for</i> | <u>C</u> ACCTGTTAGTGTTTAGGATAGAGTAG              | <i>promNtMTP2_pEntr_rev</i>  | GTTTAGAAGTTCTATGAAATTTGGGAGA |
