# Supplementary material for: Identification and characterization of a tobacco metal tolerance protein, NtMTP2
Source: Royal Society of Chemistry journal article supplement (doi:10.1039/d0mt00210k), 2020-11-03
Supplement: d0mt00210k7.pdf [file d0mt00210k7.pdf]

## Supplementary Figure S1

### Content:

- A. nucleotide and amino acid alignment of NtMTP2-X1 and NtMTP2-X2 from *Nicotiana tabacum*
- B. nucleotide (ORF with STOP codon) and protein sequence of MTP2 from *Nicotiana tabacum*
- C. MTP2 genes with the highest homology to NtMTP2, based on a search through NCBI data base,
- D. MTP2 proteins with the highest homology to NtMTP2, based on a search through NCBI data base,
- E. comparison of amino acid sequences of NtMTP2 with MTP2 sequences from different species,
- F. amino acid alignment of NtMTP2 with NtMTP6.1 and NtMTP 6.2
- G. Suggested models of transmembrane topology of chosen MTP2 and MTP6 proteins,
- H. Prediction of exons and introns organization in NtMTP2,

### A. nucleotide and amino acid alignment of NtMTP2-X1 and NtMTP2-X2 from tobacco identified by Papierniak et al.<sup>1</sup>

NtMTP2-X1 has been cloned, characterized and designated as NtMTP2 in this paper. Sequences were aligned using ClustalW. Differences between two sequences are highlighted by red.

```
NtMTP2-X2      ATGGTAGCTAGATTGATTTCAAGCAATCTAAATCGAATACGAAAAACGTATATATCATCA 60
NtMTP2-X1      ATGGTAGCTAGATTGATTTCAAGCAATCTAAATCGAATACGAAAAACGTATATATCATCA 60
*****

NtMTP2-X2      ACTATTAGATACAACAACAATTTCACTCCTCTATATCTATCTCCCAATTTCCAATTCGAT 120
NtMTP2-X1      ACTATTAGATACAACAACAATTTCACTCCTCTATATCTATCTCCCAATTTCCAATTCGAT 120
*****

NtMTP2-X2      AATGATGATTCAGCTACAAGTATGGGGAGTCGCAGCTTTATGCTTCAGAAAAGATGGCAT 180
NtMTP2-X1      AATGATGATTCAGCTACAAGTATGGGGAGTCGCAGCTTTATGCTTCAGAAAAGATGGCAT 180
*****

NtMTP2-X2      ACGGGACATTCACATTCACATCATGACCATGACGACCTCCGCTCCGGTAAAAACGGCGAG 240
NtMTP2-X1      ACGGGACATTCACATTCACATCATGACCATGACGACCTCCGCTCCGGTAAAAACGGCGAG 240
*****

NtMTP2-X2      AGGATTTTCCGGCTTGGCCTCGCTGCTGATATTGGCCTCGCCGCCAGTAAAGCTTTCACA 300
NtMTP2-X1      AGGATTTTCCGGCTTGGCCTCGCTGCTGATATTGGCCTCGCCGCCAGTAAAGCTTTCACA 300
*****

NtMTP2-X2      GGTATATATGTGGTAGCACC GCCATTATCGCTGATGCCGCCATTCTATCTCCGATGTG 360
NtMTP2-X1      GGTATATATGTGGTAGCACC GCCATTATCGCTGATGCCGCCATTCTATCTCCGATGTG 360
*****

NtMTP2-X2      GTTCTGAGTGGAGTGGCATTGCTGTCGTTTAAAGCTGCAAGGGTTCCAAGGACAAAGAA 420
NtMTP2-X1      GTTCTGAGTGGAGTGGCATTGCTGTCGTTTAAAGCTGCAAGGGTTCCAAGGACAAAGAA 420
*****

NtMTP2-X2      CATCCTTATGGACATGGTAAATTTGAGACTCTTGAGACTCTTGGAATTTCTGGTGTACTA 480
NtMTP2-X1      CATCCTTATGGACATGGTAAATTTGAGACTCTTGAGACTCTTGGAATTTCTGGTGTACTA 480
*****
```

NtMTP2-X2 TTGGCTACTGCTGGAGGTATTGGATGGCATGCTTTAGATGTTTTGCTGGGATTATGGTCT 540  
 NtMTP2-X1 TTGGCTACTGCTGGAGGTATTGGATGGCATGCTTTAGATGTTTTGCTGGGATTATGGTCT 540  
 \*\*\*\*\*

NtMTP2-X2 ACAGCGCCCCGAAGTTGTTAACCAAGTCATTGAGTCATCTGGACGTGCATGAGCAACATCAT 600  
 NtMTP2-X1 ACAGCGCCCCGAAGTTGTTAACCAAGTCATTGAGTCATCTGGACGTGCATGAGCAACATCAT 600  
 \*\*\*\*\*

NtMTP2-X2 AGTGGACATCACCATGGAATAGATATGGATCACCCATTCTTGCTTTGAATGTGACTATA 660  
 NtMTP2-X1 AGTGGACATCACCATGGAATAGATATGGATCACCCATTCTTGCTTTGAATGTGACTATA 660  
 \*\*\*\*\*

NtMTP2-X2 CTCTCTATAGCTGTTAAAGAAGGATTATACTGGATGACAAAGAGAGCGGGGGATAAGATT 720  
 NtMTP2-X1 CTCTCTATAGCTGTTAAAGAAGGATTATACTGGATGACAAAGAGAGCGGGGGATAAGATT 720  
 \*\*\*\*\*

NtMTP2-X2 GGCAGTGGACTGATGAAAGCCAAATGCTTGGCATCATCGTGCTGATGCAGTATCCTCCGTC 780  
 NtMTP2-X1 GGCAGTGGACTGATGAAAGCCAAATGCTTGGCATCATCGTGCTGATGCAGTATCCTCCGTC 780  
 \*\*\*\*\*

NtMTP2-X2 GTTGCTCTCATAGGAGTT----- 798  
 NtMTP2-X1 GTTGCTCTCATAGGAGTTGGTGGTTCAATCCTGGGGTGAGGATCCTTGATCCACTTGCT 840  
 \*\*\*\*\*

NtMTP2-X2 -----GGCATGATCATGAAAGCTGGACTTGAAACCGGATATCAGAGTGTC 843  
 NtMTP2-X1 GGGCTTGTGTGTCAGGCATGATCATGAAAGCTGGACTTGAAACCGGATATCAGAGTGTC 900  
 \*\*\*\*\*

NtMTP2-X2 TTGGAATTGGTTGATGCTGCTATTTCCTTACATACCCTGAAGCCTTTCAAGCGCATGATT 903  
 NtMTP2-X1 TTGGAATTGGTTGATGCTGCTATTTCCTTACATACCCTGAAGCCTTTCAAGCGCATGATT 960  
 \*\*\*\*\*

NtMTP2-X2 CTACAAGTTGATGGAGTTAAGGGATGCAGTCACCTGAGGGGAAGGAGGGCTGGTTCATAT 963  
 NtMTP2-X1 CTACAAGTTGATGGAGTTAAGGGATGCAGTCACCTGAGGGGAAGGAGGGCTGGTTCATAT 1020  
 \*\*\*\*\*

NtMTP2-X2 CTCTATCTTGATGTTATTGTTGAGGTTGACCCCTTTTCTAGTGTGAGTGCCGCACATGAA 1023  
 NtMTP2-X1 CTCTATCTTGATGTTATTGTTGAGGTTGACCCCTTTTCTAGTGTGAGTGCCGCACATGAA 1080  
 \*\*\*\*\*

NtMTP2-X2 ATCGGGGAAAACGTCCGCCGTGAAATCCAGCAGTTACATCCCGAAAATTGCCGAAGTCTTC 1083  
 NtMTP2-X1 ATCGGGGAAAACGTCCGCCGTGAAATCCAGCAGTTACATCCCGAAAATTGCCGAAGTCTTC 1140  
 \*\*\*\*\*

NtMTP2-X2 GTACACATAGAGCCATCCACTATACACATTCCACCAACTGTTGTGTTTTCAGCAGAGGGCT 1143  
 NtMTP2-X1 GTACACATAGAGCCATCCACTATACACATTCCACCAACTGTTGTGTTTTCAGCAGAGGGCT 1200  
 \*\*\*\*\*

NtMTP2-X2 AACACAATGGGTGCCCCCAAGACCATTCTTCAATGGAGCTCGCAGACATTGAAAATAAA 1203  
 NtMTP2-X1 AACACAATGGGTGCCCCCAAGACCATTCTTCAATGGAGCTCGCAGACATTGAAAATAAA 1260  
 \*\*\*\*\*

NtMTP2-X2 GTTTACAACATTTTATCTACAACTATTCTCAGAAGATGATAATTGAGCGTGTAATCCA 1263  
 NtMTP2-X1 GTTTACAACATTTTATCTACAACTATTCTCAGAAGATGATAATTGAGCGTGTAATCCA 1320  
 \*\*\*\*\*

NtMTP2-X2 CATCTGTTGCAAGGACAGATTTTACTTCAAGTTGAAGTTTCTATGCCTCCTGATCTCTTG 1323  
 NtMTP2-X1 CATCTGTTGCAAGGACAGATTTTACTTCAAGTTGAAGTTTCTATGCCTCCTGATCTCTTG 1380  
 \*\*\*\*\*

NtMTP2-X2 ATTAGGGATGCGGAAAAAGTTGCAGAAGAAGCAGAGAAATTAATCATAGAGGCAGCACCA 1383  
 NtMTP2-X1 ATTAGGGATGCGGAAAAAGTTGCAGAAGAAGCAGAGAAATTAATCATAGAGGCAGCACCA 1440  
 \*\*\*\*\*

NtMTP2-X2 GATATTGTTTCATGTGTGCATTTCAGCTACGCCTAGGGCAACCTATGCCAGAGCCTTACAAG 1443  
 NtMTP2-X1 GATATTGTTTCATGTGTGCATTTCAGCTACGCCTAGGGCAACCTATGCCAGAGCCTTACAAG 1500  
 \*\*\*\*\*

|           |                                                                         |      |
|-----------|-------------------------------------------------------------------------|------|
| NtMTP2-X2 | GAATGGGTGGACAGTAGAAGTGAGAGGAAAGATAACTGA                                 | 1482 |
| NtMTP2-X1 | GAATGGGTGGACAGTAGAAGTGAGAGGAAAGATAACTGA                                 | 1539 |
|           | *****                                                                   |      |
| NtMTP2-X2 | MVARLISSNLNRIRKTYISSIRYNNNFTPLYLSPNFQFDNDDSATSMGSRSFMLQKRWH             | 60   |
| NtMTP2-X1 | MVARLISSNLNRIRKTYISSIRYNNNFTPLYLSPNFQFDNDDSATSMGSRSFMLQKRWH             | 60   |
|           | *****                                                                   |      |
| NtMTP2-X2 | TGHSHSHHDHDDLRSKGKNGERIFRLGLAADIGLAASKAFTGYICGSTAI IADAHSISDV           | 120  |
| NtMTP2-X1 | TGHSHSHHDHDDLRSKGKNGERIFRLGLAADIGLAASKAFTGYICGSTAI IADAHSISDV           | 120  |
|           | *****                                                                   |      |
| NtMTP2-X2 | VLSGVALLSFKAARVPKDKHEHPYGHGKFETL GALG I SGVLLATAGGIGWHALDVLLGLWS        | 180  |
| NtMTP2-X1 | VLSGVALLSFKAARVPKDKHEHPYGHGKFETL GALG I SGVLLATAGGIGWHALDVLLGLWS        | 180  |
|           | *****                                                                   |      |
| NtMTP2-X2 | TAPEVVNQSLSHLDVHEQHHSGHGGHIDMDHPILALNVTILSIAVKEGLYWMTKRAGDKI            | 240  |
| NtMTP2-X1 | TAPEVVNQSLSHLDVHEQHHSGHGGHIDMDHPILALNVTILSIAVKEGLYWMTKRAGDKI            | 240  |
|           | *****                                                                   |      |
| NtMTP2-X2 | GSGLMKANAWHHRADAVSSVVALIGV-----GMIMKAGLETGYQSV                          | 281  |
| NtMTP2-X1 | GSGLMKANAWHHRADAVSSVVALIGV <b>GGSI L GVRILDPLAGLVVA</b> GMIMKAGLETGYQSV | 300  |
|           | *****                                                                   |      |
| NtMTP2-X2 | LELVDAAI PSHTL KPFKRMILQVDGVKGC SHLRGRRAGSYLYLDVIVEVDPFSSVSAAHE         | 341  |
| NtMTP2-X1 | LELVDAAI PSHTL KPFKRMILQVDGVKGC SHLRGRRAGSYLYLDVIVEVDPFSSVSAAHE         | 360  |
|           | *****                                                                   |      |
| NtMTP2-X2 | IGENVRREIQQLHPEIAEVFVHIEPSTIHIPP TVVFQQRANTMGAPQDHSSMELADIENK           | 401  |
| NtMTP2-X1 | IGENVRREIQQLHPEIAEVFVHIEPSTIHIPP TVVFQQRANTMGAPQDHSSMELADIENK           | 420  |
|           | *****                                                                   |      |
| NtMTP2-X2 | VYNILSTNYSQKMI IERVNPHLLQGQILLQVEVSMPPDLLIRDAEKVAEEAEKLI IEAAP          | 461  |
| NtMTP2-X1 | VYNILSTNYSQKMI IERVNPHLLQGQILLQVEVSMPPDLLIRDAEKVAEEAEKLI IEAAP          | 480  |
|           | *****                                                                   |      |
| NtMTP2-X2 | DIVHVCIQRLRLGQPMPEPYKEWVDSR SERKDN                                      | 493  |
| NtMTP2-X1 | DIVHVCIQRLRLGQPMPEPYKEWVDSR SERKDN                                      | 512  |
|           | *****                                                                   |      |

## B. nucleotide and protein sequence of MTP2 from *Nicotiana tabacum*

START and STOP sequence are underlined.

>*NtMTP2* (1539bp - XM\_016593653.1); initially identified by Papierniak et al.<sup>1</sup> as NtMTP2-X1

ATGGTAGCTAGATTGATTTCAAGCAATCTAAATCGAATACGAAAAACGTATATATCATCAACTATTAGAT  
ACAACAACAATTTCACTCCTCTATATCTATCTCCAATTTCCAATTCGATAATGATGATTCAGCTACAAG  
TATGGGGAGTCGCAGCTTTATGCTTCAGAAAAGATGGCATAACGGGACATTCACATTCACATCATGACCAT  
GACGACCTCCGCTCCGGTAAAAACGGCGAGAGGATTTTCCGGCTTGGCCTCGCTGCTGATATTGGCCTCG  
CCGCCAGTAAAGCTTTACAGGTTATATATGTGGTAGCACCGCCATTATCGCTGATGCCGCCATTCTAT  
CTCCGATGTGGTTCTGAGTGGAGTGGCATTGCTGTCTGTTAAAGCTGCAAGGGTTCCCAAGGACAAAGAA  
CATCCTTATGGACATGGTAAATTTGAGACTCTTGGAGCTCTTGAATTTCTGGTGTACTATTGGCTACTG  
CTGGAGGTATTGGATGGCATGCTTTAGATGTTTTGCTGGGATTATGGTCTACAGCGCCGAAGTTGTTAA  
CCAGTCATTGAGTCATCTGGACGTGCATGAGCAACATCATAGTGGACATCACCATGGAATAGATATGGAT  
CACCTATTCTTGCTTTGAATGTGACTATACTCTCTATAGCTGTTAAAGAAGGATTATACTGGATGACAA  
AGAGAGCGGGGATAAGATTGGCAGTGGACTGATGAAAGCCAATGCTTGGCATCATCGTGCTGATGCAGT  
ATCCTCCGTCGTTGCTCTCATAGGAGTTGGTGGTTCAATCCTTGGGGTGAGGATCCTTGATCCACTTGCT  
GGGCTTGTTGTTGCAGGCATGATCATGAAAGCTGGACTTGAAACCGGATATCAGAGTGTCTTGGAATTGG  
TTGATGCTCATCTTCTTACATACCTTGAAGCCTTTCAAGCGCATGATTCTACAAGTTGATGGAGTTAA  
GGGATGCAGTCACCTGAGGGGAAGGAGGGCTGGTTCATATCTCTATCTTGTATGTTGTTGAGTTGAC  
CCTTTTCTAGTGTGAGTGCCGCACATGAAATCGGGGAAAACGTCGCCGTGAAATCCAGCAGTTACATC  
CCGAAATTGCCGAAGTCTTCGTACACATAGAGCCATCCACTATACACATTCCACCAACTGTTGTGTTTCA  
GCAGAGGGCTAACACAATGGGTGCCCCCAAGACCATTCTTCAATGGAGCTCGCAGACATTGAAAAATAAA

GTTTACAACATTTTATCTACAACTATTCTCAGAAGATGATAATTGAGCGTGTAAATCCACATCTGTTGC  
AAGGACAGATTTTACTTCAAGTTGAAGTTTCTATGCCTCCTGATCTCTTGATTAGGGATGCGGAAAAAGT  
TGCAGAAGAAGCAGAGAAATTAATCATAGAGGCAGCACCAGATATTGTTTCATGTGTGCATTACAGCTACGC  
CTAGGGCAACCTATGCCAGAGCCTTACAAGGAATGGGTGGACAGTAGAAGTGAGAGGAAAAGATAACTGA

>**NtMTP2** (512aa - XP\_016449139.1)

MVARLISSNLNRIRKTYISSTIRYNNNFPLYLSPNFQFDNDDSATSMGSRSFMLQKRWHTGHS SHSHHDH  
DDLRSKGNGERIFRLGLAADIGLAASKAFTGYICGSTAI IADAAHSISDVVLSGVALLSFKAARVPKDK  
HPYGHGKFETL GALGISGVLLATAGGIGWHALDVLLGLWSTAPEVVNQSLSHLDVHEQHHS GHHHGIDMD  
HPILALNVTILSIAVKEGLYWMTKRAGDKIGSGLMKANAWHHRADAVSSVVALIGVGG SILGVRILDPLA  
GLVVAGMIMKAGLETGYQSVLELVDAAPSHTLKPFKRMILQVDGKGC SHLRGRAGSYLYLDVIVEVD  
PFSSVSA AHEIGENVRREIQQLHPEIAEVFVHIEPSTIHIPPTVVFQQRANTMGAPQDHS SMELAD IENK  
VYNILSTNYSQKMI IERVNPHLLQGQILLQVEVSMPPDLLIRDAEKVAEEAEKLI IEAAPDIVHVC IQLR  
LGQPMPEPYKEWVDSRSEKDN\*

**C. MTP2 genes with the highest homology to NtMTP2, based on a search through NCBI data base**

The cDNA nucleotide sequence acc no XM\_016593653.1 (named later in this study as NtMTP2) was used as a query to search through NCBI data base for genes with the highest homology (<https://blast.ncbi.nlm.nih.gov/>)

**The list of genes identified as the best Blast Hits are given in the Table below**

| Description                                                                       | Identity | Max score | Total score | Query cover | E-value | Accession no.  | References                         |
|-----------------------------------------------------------------------------------|----------|-----------|-------------|-------------|---------|----------------|------------------------------------|
| <i>Nicotiana sylvestris</i> metal tolerance protein 2                             | 99.68%   | 2815      | 2815        | 100%        | 0.0     | XM_009782572.1 | NCBI                               |
| <i>Nicotiana attenuata</i> metal tolerance protein 2, transcript variant X2       | 98.70%   | 2732      | 2732        | 100%        | 0.0     | XM_019378745.1 | NCBI                               |
| <i>Nicotiana tomentosiformis</i> metal tolerance protein 2, transcript variant X2 | 97.26%   | 2599      | 2599        | 99%         | 0.0     | XM_009606364.1 | NCBI                               |
| <i>Solanum tuberosum</i> metal tolerance protein 2, transcript variant X1         | 85.56%   | 1544      | 1544        | 98%         | 0.0     | XM_006359348   | Leitch et al. 2008 <sup>(2)</sup>  |
| <i>Glycine max</i> Metal tolerance protein 2                                      | 74.90%   | 653       | 718         | 74%         | 0.0     | XM_003518906.4 | NCBI                               |
| <i>Cucumis sativus</i> Metal tolerance protein 2                                  | 73.37%   | 557       | 557         | 74%         | 3e-157  | XM_004136132.3 | NCBI                               |
| <i>Populus trichocarpa</i> Metal tolerance protein 2                              | 71.44%   | 645       | 645         | 82%         | 0.0     | XM_006386701.2 | Gustin et al. 2011 <sup>(3)</sup>  |
| <i>Oryza sativa</i> Japonica Group Metal tolerance protein 2                      | 71.09%   | 442       | 442         | 59%         | 4e-121  | XP_015628702.1 | Gustin et al. 2011 <sup>(3)</sup>  |
| <i>Vitis vinifera</i> Metal tolerance protein 2                                   | 61.75%   | 497       | 497         | 99%         | 1e-171  | XP_002269478.3 | Shirazi et al. 2019 <sup>(4)</sup> |

|                                                                                                                                                                                                                                                                                                                                                                                           |        |     |     |     |        |                         |                                                |
|-------------------------------------------------------------------------------------------------------------------------------------------------------------------------------------------------------------------------------------------------------------------------------------------------------------------------------------------------------------------------------------------|--------|-----|-----|-----|--------|-------------------------|------------------------------------------------|
| <i>Medicago truncatula</i><br>Metal tolerance protein 2<br>isoform X1                                                                                                                                                                                                                                                                                                                     | 61.21% | 475 | 475 | 96% | 3e-164 | XP_013469204.1          | León-Mediavilla,<br>et al. 2018 <sup>(5)</sup> |
| The sequences of <i>NtMTP6.1</i> and <i>NtMTP6.2</i> genes were not annotated in the NCBI; they were extracted from the genome annotation files at Sol Genomics (Liu et al. 2019). The identity of nucleotide sequences of <i>NtMTP6.1</i> and <i>NtMTP6.2</i> with <i>NtMTP2</i> is given below.<br>Comparison of amino acid sequences is given in the section (d) and (e) of this file. |        |     |     |     |        |                         |                                                |
| NtMTP6.1                                                                                                                                                                                                                                                                                                                                                                                  | 98.39% | -   | -   | -   | -      | Nitab4.5_0001447g0040.1 | Liu et al. 2019 <sup>(6)</sup>                 |
| NtMTP6.2                                                                                                                                                                                                                                                                                                                                                                                  | 96.83% | -   | -   | -   | -      | Nitab4.5_0001697g0140.1 | Liu et al. 2019 <sup>(6)</sup>                 |

**D. MTP2 proteins with the highest homology to NtMTP2, based on based on a search through NCBI data base (<https://blast.ncbi.nlm.nih.gov/>)**

| Description                                                           | Ident. | Max score | Total score | Query cover | E-value | Accession no.  |
|-----------------------------------------------------------------------|--------|-----------|-------------|-------------|---------|----------------|
| <i>Nicotiana sylvestris</i> metal tolerance protein 2                 | 99.41% | 1041      | 1041        | 100%        | 0.0     | XP_009780874.1 |
| <i>Nicotiana attenuata</i> metal tolerance protein 2 isoform X1       | 97.85% | 1023      | 1023        | 100%        | 0.0     | XP_019234290.1 |
| <i>Nicotiana tomentosiformis</i> metal tolerance protein 2 isoform X2 | 95.50% | 945       | 945         | 99%         | 0.0     | XP_009604659.1 |
| <i>Solanum tuberosum</i> metal tolerance protein 2 isoform X1         | 82.42% | 799       | 799         | 99%         | 0.0     | XP_006359410.1 |
| <i>Cucumis sativus</i> metal tolerance protein 2                      | 65.26% | 591       | 591         | 91%         | 0.0     | XP_004136180.1 |
| <i>Populus trichocarpa</i> metal tolerance protein 2                  | 65.71% | 558       | 558         | 87%         | 0.0     | XP_006386763.1 |
| <i>Glycine max</i> metal tolerance protein 2                          | 62.88% | 557       | 557         | 95%         | 0.0     | XP_003536229.1 |
| <i>Vitis vinifera</i> metal tolerance protein 2                       | 61.67% | 570       | 570         | 98%         | 0.0     | XP_002269478.3 |
| <i>Medicago truncatula</i> metal tolerance protein 2 isoform X1       | 60.37% | 555       | 555         | 95%         | 0.0     | XP_013469204.1 |
| Cation efflux family protein [ <i>Arabidopsis thaliana</i> ] MTP6     | 60.27% | 533       | 533         | 85%         | 0.0     | NP_182304.2    |
| <i>Oryza sativa</i> Japonica Group metal tolerance protein 2          | 59.81% | 485       | 485         | 81%         | 1e-167  | XP_015628702.1 |

### E. Comparison of amino acid sequences of NtMTP2 with MTP2 sequences from different species;

Sequence identity between selected MTP proteins from *N. tabacum*, *A. thaliana*, *V. vinifera*, *P. trichocarpa*, *Cucumis sativus*, *O. sativa*, *M. trunculata*, *S. tuberosum* species. The list of MTP2 proteins and percent identity matrix – created by Clustal2.1. MTP proteins chosen for comparison reside on the same clade on the dendrogram depicted in the Figure 1.

|               | StMTP2 | NtMTP6.1 | NtomMTP2 | NtMTP6.2 | NaMTP2 | <b>NtMTP2</b> | NsMTP2 | AtMTP6 | OsMTP2 | PtrMTP6 | VvMTP2 | CsMTP2 | GmMTP2 | MtMTP6 | MtMTP2 | AtMTP2 |
|---------------|--------|----------|----------|----------|--------|---------------|--------|--------|--------|---------|--------|--------|--------|--------|--------|--------|
| StMTP2        | 100.00 |          |          |          |        |               |        |        |        |         |        |        |        |        |        |        |
| NtMTP6.1      | 82.53  | 100.00   |          |          |        |               |        |        |        |         |        |        |        |        |        |        |
| NtomMTP2      | 84.77  | 93.63    | 100.00   |          |        |               |        |        |        |         |        |        |        |        |        |        |
| NtMTP6.2      | 84.60  | 93.75    | 98.83    | 100.00   |        |               |        |        |        |         |        |        |        |        |        |        |
| NaMTP2        | 85.54  | 96.51    | 96.88    | 96.48    | 100.00 |               |        |        |        |         |        |        |        |        |        |        |
| <b>NtMTP2</b> | 84.34  | 98.36    | 95.31    | 94.92    | 97.85  | 100.00        |        |        |        |         |        |        |        |        |        |        |
| NsMTP2        | 84.34  | 97.74    | 95.12    | 94.73    | 97.66  | 99.41         | 100.00 |        |        |         |        |        |        |        |        |        |
| AtMTP6        | 59.15  | 58.43    | 60.35    | 60.22    | 60.35  | 59.69         | 59.69  | 100.00 |        |         |        |        |        |        |        |        |
| OsMTP2        | 60.16  | 59.04    | 61.60    | 61.44    | 61.60  | 60.80         | 60.80  | 62.88  | 100.00 |         |        |        |        |        |        |        |
| PtrMTP6       | 62.14  | 59.07    | 60.81    | 60.89    | 61.21  | 60.40         | 60.40  | 62.18  | 62.79  | 100.00  |        |        |        |        |        |        |
| VvMTP2        | 62.50  | 57.65    | 61.14    | 57.88    | 62.30  | 61.11         | 61.31  | 66.67  | 67.20  | 68.94   | 100.00 |        |        |        |        |        |
| CsMTP2        | 62.63  | 61.03    | 62.91    | 62.99    | 63.11  | 62.30         | 62.30  | 65.64  | 63.93  | 67.94   | 68.27  | 100.00 |        |        |        |        |
| GmMTP2        | 63.83  | 61.57    | 64.51    | 64.38    | 64.30  | 63.26         | 63.05  | 65.26  | 67.12  | 67.42   | 69.47  | 71.66  | 100.00 |        |        |        |
| MtMTP6        | 62.82  | 59.91    | 61.86    | 62.14    | 62.27  | 61.24         | 61.24  | 62.78  | 63.37  | 65.72   | 66.60  | 68.02  | 80.94  | 100.00 |        |        |
| MtMTP2        | 20.86  | 21.29    | 20.97    | 20.70    | 20.97  | 21.58         | 21.58  | 20.79  | 19.75  | 22.26   | 21.15  | 23.10  | 20.56  | 19.94  | 100.00 |        |
| AtMTP2        | 23.05  | 22.85    | 22.73    | 22.67    | 23.43  | 23.78         | 23.43  | 23.08  | 22.42  | 23.43   | 23.59  | 26.57  | 25.35  | 24.11  | 50.46  | 100.00 |

## F. Amino acid sequence alignment of NtMTP2 and NtMTP6.1 and NtMTP6.2;

Sequences were aligned using ClustalW; asterisk indicate sequence identity, the cation diffusion facilitator (CDF) signature sequence is marked in the frame. Histidine residues are highlighted by black, leucine from LZ-motif are black, whereas the transmembrane domains (TMD) predicted by TMPred are grey shading.

CLUSTAL O(1.2.4) multiple sequence alignment

|          |                                                                                                     |     |
|----------|-----------------------------------------------------------------------------------------------------|-----|
| NtMTP6.1 | MTLFDSQKELLRNQIDQLENIVLRQCNTLGVNPLSQEMAAGALS IKIGKRPRDLLNPKAI                                       | 60  |
| NtMTP2   | -----                                                                                               | 0   |
| NtMTP6.2 | MTLFDSQKELLRNQIDQLENIVLRQCNTLGVNPLSQEMAAGALS IKIGKRPRDLLNPKAI                                       | 60  |
| NtMTP6.1 | KYMQSVFSIKDSINKKETREISALFGVTVTQVRDFFTAQRTRVRKFLRLSREKASISNAS                                        | 120 |
| NtMTP2   | -----                                                                                               | 0   |
| NtMTP6.2 | KYMQSVFSIKDAINKKETREISALFGVTVTQVRDFFTAQRTRVRKFLRLSREKASISNAF                                        | 120 |
| NtMTP6.1 | IEGPCPIPLSSESDPSSQTEPVPLDSVAPTCTEEGpscstQDDVLTGIEETDKHFLDNIL                                        | 180 |
| NtMTP2   | -----                                                                                               | 0   |
| NtMTP6.2 | IEGPCPIPLSS-DPSSHTEPVPLDSVAPTCTDVGpscstQDEVLTGIEETDKHFLDNIL                                         | 178 |
| NtMTP6.1 | TLMRKEETFSGQVKLMDWILEVQNPSVLFWA-----                                                                | 211 |
| NtMTP2   | -----                                                                                               | 0   |
| NtMTP6.2 | TLMRKEETFSGQVKLMDWILEVQNPSVLFWFLAKGGVMILATWLSQAAVEEQTGVLIIL                                         | 238 |
| NtMTP6.1 | -----RILLAKWSKMFAKSQAMKKRNG                                                                         | 233 |
| NtMTP2   | -----                                                                                               | 0   |
| NtMTP6.2 | KVLC <del>HL</del> PL <del>H</del> KAFPV <del>H</del> MSAILQSVNRLRFYRTPDISNRARILLAKWSKMFAKSQAMKKRNG | 298 |
| NtMTP6.1 | IKSASDVQDELLLQQSIGEVMGDEIWNSKAEDVGESHANLCGPSEYSRKLDSHPVKLLT                                         | 293 |
| NtMTP2   | -----                                                                                               | 0   |
| NtMTP6.2 | IKSASDVQDELLLQQSISEVMGDEIWNSKAEDVGESHANLCGPSENSSAL-----                                             | 348 |
| NtMTP6.1 | ASSDDSTKRLNKGALASSILRCLCATSETRERRKVLMEQPSQRTTGRSLAVGRPATATQ                                         | 353 |
| NtMTP2   | -----                                                                                               | 0   |
| NtMTP6.2 | -----ATSETRERRKVLMEQPSQRTTGRSLAVGRPATATQ                                                            | 384 |
| NtMTP6.1 | GRPLSADDIQKAKMRAQFMQSKYGKAKNDESSRVKAEAPNGVTPQDDILQGDPKLLGCP                                         | 413 |
| NtMTP2   | -----                                                                                               | 0   |
| NtMTP6.2 | GRPLSADDIQKAKMRAQFMQSKYGKAKNDESSLVKPEAPNGVTPSPQDDILQGAPKLQGCP                                       | 444 |
| NtMTP6.1 | KDDE <del>HE</del> KLDSVALKGFKQQES <del>H</del> RKLSFDVEEPPWKRCRRMQIPWCKPPEVKMSDAWKVCD              | 473 |
| NtMTP2   | -----                                                                                               | 0   |
| NtMTP6.2 | KDDE <del>HE</del> KLDSVALKGSNQQES <del>H</del> RKLSFDVEEPPWKRCRRMQIPWCKPPEVTMSDAWKVCA              | 504 |
| NtMTP6.1 | GGESKEVDIQNNRIRRRERETIYRTVQEIPLNPKPEWDREMPDDTLTTEIPIEQLPDAEG                                        | 533 |
| NtMTP2   | -----                                                                                               | 0   |
| NtMTP6.2 | GGESKEVDIQNKIRRRERETIYRTVQEIPLNPKPEWDREMPDDTLTTEIPIEQLPDTEG                                         | 564 |
| NtMTP6.1 | AETVVLRPEDDETEAASASTSNGIATTAEPDVELLAVLLKNPELVYALTSGQAGNLSSEE                                        | 593 |
| NtMTP2   | -----                                                                                               | 0   |
| NtMTP6.2 | AETVVLRPEDDETEAASASTSNGIATTAEPDVELLAVLLKNPELVYALTSGQAGNLSSEE                                        | 624 |

|          |                                                                |      |
|----------|----------------------------------------------------------------|------|
| NtMTP6.1 | TVKLLDMIKANGMNSLSSVTDLGRTAEKKVEVSLPSPTPSSDPGTSGSMQGFQAKNPFQSR  | 653  |
| NtMTP2   | -----                                                          | 0    |
| NtMTP6.2 | TVKLLDMIKANGMNSLNSVTDLGRIAEEKVEVSLPSPTPSSDPGTSGSMQNFQAKNPFQSR  | 684  |
| NtMTP6.1 | SLMAVPEANGATQLAVLVRVQEKLQTSSTSIYQSTSTTMLAPQQLPIAPQLAQQLSLLQA   | 713  |
| NtMTP2   | -----                                                          | 0    |
| NtMTP6.2 | SLMAVPEANGATRLAGLVRVQEKLQASSSIYQSTSTTMLASQQLPIAPQLAQQLSLLQA    | 744  |
| NtMTP6.1 | AAGSFGKDHRLSPLNPNLNQTVLANPMHSQLSASEPAVNRNNYSPFGLTEYNLHSAATASA  | 773  |
| NtMTP2   | -----                                                          | 0    |
| NtMTP6.2 | AAGSFEKDHRLSPLNPNLNQTVLANPMHSQLSTSEPAVNRNNYSPFGLTEYNLHSAAT-A   | 802  |
| NtMTP6.1 | ATTRIQGQTSGNIRSSPMPIANVQERTISLHMPQMAVSHTPPRPQLQTQPRPGYAPEHMMW  | 833  |
| NtMTP2   | -----                                                          | 0    |
| NtMTP6.2 | ATTRIQGETSGNIRSSPMPIANVQQRTVSLHMPQMAVSHTPPRPQLQTQPPQPGYTPHMMW  | 862  |
| NtMTP6.1 | GTMSGSTLNRGYQENSIPNHYNTRLAGHGEPLGQAAWRGNVVEEAGFESWSPDNSPVRR    | 893  |
| NtMTP2   | -----                                                          | 0    |
| NtMTP6.2 | GTMSGSALNRGYQENSIPNHYNHLAGHVEPLGQAAWRGNVVEEAGFESWSPDNSPVRR     | 922  |
| NtMTP6.1 | QEQLGRWNHSEPRMNMRENYRSDWSTLRNPSYYSYGHGPDDGGNRRWA-----          | 941  |
| NtMTP2   | -----                                                          | 0    |
| NtMTP6.2 | QEQVGRWNHSEPRMNMRENYRSDLSTSRNPSYHSGYRGPDDGGNRRWVAFFNHSSASQI    | 982  |
| NtMTP6.1 | -----RLISSNLNRIRKTYISSITRYNNNFPLYLSPNFQFDNDDSATSM              | 986  |
| NtMTP2   | -----MVARLISSNLNRIRKTYISSITRYNNNFPLYLSPNFQFDNDDSATSM           | 48   |
| NtMTP6.2 | RAILPNFIELLNMFARFISSNLNRIRKTYIASTIRYNNNFPLYLSPNLQFDNDDSATSI    | 1042 |
|          | *:*****:*****:*****:*****                                      |      |
|          | <b>TMD I</b>                                                   |      |
| NtMTP6.1 | GSRSFMLQKRWHGTGHSHSHHDDDLRSGKNGERIFRLGLAADIGLAASKAFTGYICGSTA   | 1046 |
| NtMTP2   | GSRSFMLQKRWHGTGHSHSHHDDDLRSGKNGERIFRLGLAADIGLAASKAFTGYICGSTA   | 108  |
| NtMTP6.2 | GNSRFMLQKRWHMGHSHSHHDDDLRSGKNGERIFRLGLAADIGLAASKAFTGYICGSTA    | 1102 |
|          | * *****:*****:*****:*****                                      |      |
|          | <b>HxxxD TMD II TMD III</b>                                    |      |
| NtMTP6.1 | IIADAAHSISDVVLSGVALLSFKAARVPKDKEHPYGHGKFETLGLALGISGVLLATAGGIG  | 1106 |
| NtMTP2   | IIADAAHSISDVVLSGVALLSFKAARVPKDKEHPYGHGKFETLGLALGISGVLLATAGGIG  | 168  |
| NtMTP6.2 | IIADAAHSISDVVLSGVALLSFKAARVPKDKEHPYGHGKFETLGLALGISGVLLATAGGIG  | 1162 |
|          | *****                                                          |      |
|          | <b>TMD IV</b>                                                  |      |
| NtMTP6.1 | WHALDVLLGLWSTAPEVVNQSLSHLDVHEQHHSQHGGHIDMDHPILALNVTILSIAVKEG   | 1166 |
| NtMTP2   | WHALDVLLGLWSTAPEVVNQSLSHLDVHEQHHSQHGGHIDMDHPILALNVTILSIAVKEG   | 228  |
| NtMTP6.2 | WHALDVLLGLWSTAPEVVNQSLSHLDVHEQHHSQHGGHIDMDHPILALNVTILSIAVKEG   | 1222 |
|          | *****                                                          |      |
|          | <b>TMD V</b>                                                   |      |
| NtMTP6.1 | LYWMTKRAGDKIGSGLMKANAWHHRADAVSSVVALIGVGGSI LGVRILDPLAGLVVAGMI  | 1226 |
| NtMTP2   | LYWMTKRAGDKIGSGLMKANAWHHRADAVSSVVALIGVGGSI LGVRILDPLAGLVVAGMI  | 288  |
| NtMTP6.2 | LYWITKRAGDKIGSGLMKANAWHHRADAVSSVVALIGVGGSI LGVRILDPLAGLVVAGMI  | 1282 |
|          | ***:*****:*****:*****                                          |      |
|          | <b>LZ-motif</b>                                                |      |
| NtMTP6.1 | MKAGLETGYQRSEICL-----                                          | 1242 |
| NtMTP2   | MKAGLETGYQSVLELVDAAIPTLTKPFKRMILQVDG-----                      | 325  |
| NtMTP6.2 | MKAGLETGYQSVLELVDAAIPTLTKPFKRTILQVDGVKATIPFSLLDVDTVVRNSLLP     | 1342 |
|          | *****                                                          |      |
|          | <b>ZT-dimer</b>                                                |      |
| NtMTP6.1 | -----KMGRGCSHLRGRRAGSYLYLDVIVEVDPFSSVSAAHEIGENVRR              | 1286 |
| NtMTP2   | -----VKGCSHLRGRRAGSYLYLDVIVEVDPFSSVSAAHEIGENVRR                | 367  |
| NtMTP6.2 | PTCQHLLIMYADEIFEKHLGLTGCSHLRGRRAGSYLYLDVIVEVDPFSSVSAAHEIGENVRR | 1402 |
|          | *****                                                          |      |
| NtMTP6.1 | EIQQLHPEIAEVFVHIEPSTIHPPTVVVFQQRANTMGAPQDHSSMELADIENKVYNILST   | 1346 |
| NtMTP2   | EIQQLHPEIAEVFVHIEPSTIHPPTVVVFQQRANTMGAPQDHSSMELADIENKVYNILST   | 427  |



```

NtMTP6.2      EIQQLEPEIAEVFVIEPSLIIPPTVVFQKANTMCGPQDSAMELADIENIVYNIFST 1462
*****:****.*****:***** ***:**

NtMTP6.1      NYSQKMI IERVNPHLLQGQILLQVEVSMPPDLLIRDAEKVAEEAEKLIIEAAPDIVHVC I 1406
NtMTP2        NYSQKMI IERVNPHLLQGQILLQVEVSMPPDLLIRDAEKVAEEAEKLIIEAAPDIVHVC I 487
NtMTP6.2      NFSQKMI IERVTPHLLQGQILLQVEVSMPPDLLIRDAGKVAKEAEKLIIEAAPDIVHVS I 1522
*:*:*****.*****:***** ***:*****.

NtMTP6.1      QLRLGQPMPEPYKEWVDSRSERKDN--- 1431
NtMTP2        QLRLGQPMPEPYKEWVDSRSERKDN--- 512
NtMTP6.2      QLRLGQPMPEPYKELVDSRSGRKDPNQI 1550
***** ***** **

```

**G. Suggested models of transmembrane topology of chosen MTP2 and MTP6 proteins; membrane-spanning regions and their orientation. The algorithm was based on the statistical analysis of TMbase, a database of naturally occurring transmembrane proteins. The prediction was made using a combination of several weight-matrices for scoring.**

| Protein name                      | TmPred prediction                                                                                                                                                                                                                                                                                                      |
|-----------------------------------|------------------------------------------------------------------------------------------------------------------------------------------------------------------------------------------------------------------------------------------------------------------------------------------------------------------------|
| <b>NtMTP2</b><br>XP_016449139.1   | <p>----&gt; STRONGLY preferred model: N-terminus inside</p> <p>5 strong transmembrane helices, total score : 5342</p> <p># from to length score orientation</p> <p>1 91 110 (20) 688 i-o</p> <p>2 122 140 (19) 664 o-i</p> <p>3 158 174 (17) 1737 i-o</p> <p>4 215 235 (21) 551 o-i</p> <p>5 261 281 (21) 1702 i-o</p> |
| <b>NtomMTP2</b><br>XP_009604659.1 | <p>----&gt; STRONGLY preferred model: N-terminus inside</p> <p>5 strong transmembrane helices, total score : 5386</p> <p># from to length score orientation</p> <p>1 93 112 (20) 688 i-o</p> <p>2 124 142 (19) 664 o-i</p> <p>3 160 176 (17) 1737 i-o</p> <p>4 217 240 (24) 601 o-i</p> <p>5 263 283 (21) 1696 i-o</p> |
| <b>AtMTP6</b><br>At2g4783         | <p>----&gt; STRONGLY preferred model: N-terminus inside</p> <p>5 strong transmembrane helices, total score : 5686</p> <p># from to length score orientation</p> <p>1 94 113 (20) 678 i-o</p> <p>2 112 135 (24) 593 o-i</p> <p>3 152 168 (17) 1599 i-o</p> <p>4 196 217 (22) 882 o-i</p> <p>5 242 262 (21) 1934 i-o</p> |

|                                          |                                                                                                                                                                                                                                                                                                                                    |
|------------------------------------------|------------------------------------------------------------------------------------------------------------------------------------------------------------------------------------------------------------------------------------------------------------------------------------------------------------------------------------|
| <p><b>PtrMTP6</b><br/>Potri.T034500</p>  | <p>-----&gt; STRONGLY preferred model: N-terminus inside<br/>5 strong transmembrane helices, total score : 5766<br/># from to length score orientation</p> <p>1 98 119 (22) 552 i-o<br/>2 130 153 (24) 767 o-i<br/>3 170 186 (17) 1793 i-o<br/>4 223 248 (26) 705 o-i<br/>5 273 293 (21) 1949 i-o</p>                              |
| <p><b>VvMTP2</b></p>                     | <p>-----&gt; STRONGLY preferred model: N-terminus inside<br/>3 strong transmembrane helices, total score : 3978<br/># from to length score orientation</p> <p>1 129 150 (22) 608 i-o<br/>2 201 217 (17) 1559 o-i<br/>3 304 324 (21) 1811 i-o</p>                                                                                   |
| <p><b>GmMTP2</b><br/>XP_003536229.1</p>  | <p>-----&gt; STRONGLY preferred model: N-terminus inside<br/>5 strong transmembrane helices, total score : 5300<br/># from to length score orientation</p> <p>1 80 100 (21) 517 i-o<br/>2 115 133 (19) 735 o-i<br/>3 151 167 (17) 1661 i-o<br/>4 207 228 (22) 543 o-i<br/>5 254 274 (21) 1844 i-o</p>                              |
| <p><b>CsMTP2</b><br/>XP_004136180.1</p>  | <p>-----&gt; STRONGLY preferred model: N-terminus inside<br/>5 strong transmembrane helices, total score : 5215<br/># from to length score orientation</p> <p>1 84 105 (22) 531 i-o<br/>2 111 134 (24) 550 o-i<br/>3 156 172 (17) 1643 i-o<br/>4 215 235 (21) 647 o-i<br/>5 261 281 (21) 1844 i-o</p>                              |
| <p><b>AtMTP2</b><br/>At3g61940</p>       | <p>-----&gt; STRONGLY preferred model: N-terminus inside<br/>6 strong transmembrane helices, total score : 11980<br/># from to length score orientation</p> <p>1 33 50 (18) 2007 i-o<br/>2 66 85 (20) 1592 o-i<br/>3 100 119 (20) 1920 i-o<br/>4 136 157 (22) 2714 o-i<br/>5 200 221 (22) 1571 i-o<br/>6 227 245 (19) 2176 o-i</p> |
| <p><b>MtMTP2</b><br/>Medtr4g064893.1</p> | <p>-----&gt; STRONGLY preferred model: N-terminus inside<br/>6 strong transmembrane helices, total score : 11842<br/># from to length score orientation</p> <p>1 56 75 (20) 2037 i-o<br/>2 89 108 (20) 1745 o-i<br/>3 126 146 (21) 2201 i-o<br/>4 159 177 (19) 2436 o-i</p>                                                        |

|  |   |     |          |          |
|--|---|-----|----------|----------|
|  | 5 | 263 | 282 (20) | 1439 i-o |
|  | 6 | 286 | 306 (21) | 1984 o-i |

## H. Prediction of exons and introns organization in *NtMTP2*.

FGENESH tools were used to identify ORF sequence with Start Side of Transcription (TSS), sizes/length/position of introns and exons in the regions of the CoDing Sequences (CDS; CDSf- First CoDing Sequence, CDSi- Inner CoDing Sequence, CDSl- Last CoDing Sequence) and poliA region (polA).

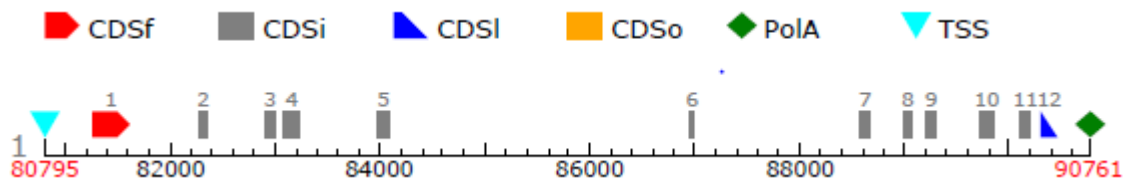

## References

1. A. Papierniak, K. Kozak, M. Kendziorek, A. Barabasz, M. Palusińska, L. Tiurny, L. E. Williams, D.M. Antosiewicz, Contribution of *NtZIP1-Like* to the regulation of Zn homeostasis, *Front. Plant. Sci.*, 2018, **9**, 185.
2. I. J. Leitch, L. Hanson, K.Y. Lim, A. Kovarik, M. W. Chase, J. J. Clarkson et al., The ups and downs of genome size evolution in polyploid species of *Nicotiana* (Solanaceae), *Ann. Bot.* 2008, **101**, 805–814.
3. J. L. Gustin, M. J. Zanis, D. E. Salt, Structure and evolution of the plant cation diffusion facilitator family of ion transporters, *BMC Evol. Biol.*, 2011, **11**, 76.
4. Z. Shirazi, A. Abedi, M. Kordrostami, M. D. J. Burritt, M. A. Hossain, Genome-wide identification and characterization of the metal tolerance protein (MTP) family in grape (*Vitis vinifera* L.), *Biotech.*, 2019, **9**, 199.
5. J. Leon-Mediavilla, M. Senovilla, J. Montiel, P. Gil-Diez, A. Saez, I. S. Krivoruchko, M. Reguera, M. K. Udvardi, J. Imperial, M. Gonzalez-Guerrero, MtMTP2-facilitated zinc transport into intracellular compartments is essential for nodule development in *Medicago truncatula*, *Front. Plant Sci.*, 2018, **9**, 990.
6. J. Liu, Y. Gao, Y. Tang, D. Wang, X. Chen, Y. Yao, Y. Guo, Genome-wide identification, comprehensive gene feature, evolution, and expression analysis of plant metal tolerance proteins in tobacco under heavy metal toxicity, *Front. Genet.*, 2019, <https://doi.org/10.3389/fgene.2019.00345>.
